# Supplementary material
Source: publisher figshare collection journal article supplement (https://rs.figshare.com/ndownloader/files/30855998)
Supplement: Supplementary file 1 [file 30855998]

## Sheet: Non-breeding season
Time to sunrise (min)	416 nm	478 nm	542 nm	607 nm
-38	0.15576	0.096619	0.13514	0.16332
-37	0.19521	0.038363	0.13034	0.18821
-36	0.10657	0.14577	0.17521	0.20889
-35	0.27959	0.17067	0.1056	0.14283
-34	0.11769	0.1399	0.13024	0.23187
-33	0.34788	0.29006	0.017098	0.025064
-32	0.26834	0.19029	0.19443	0.29427
-31	0.49277	0.38303	0.37515	0.35388
-30	0.52945	0.3256	0.44616	0.34621
-29	0.6072	0.40992	0.46135	0.53385
-28	0.78999	0.61288	0.53382	0.58847
-27	0.84826	0.74697	0.72345	0.77435
-26	1.042	0.9381	0.79141	0.91071
-25	1.2666	1.0079	0.98552	1.1369
-24	1.6278	1.2683	1.3346	1.3426
-23	1.9894	1.6161	1.6204	1.7117
-22	2.5636	2.1997	2.1157	2.1342
-21	3.1981	2.6626	2.5797	2.6801
-20	4.0887	3.4172	3.2353	3.5848
-19	5.4243	4.6687	4.4711	4.9205
-18	7.4599	6.5132	6.4356	6.9101
-17	10.294	8.755	8.5966	9.1541
-16	13.486	11.097	10.61	11.128
-15	15.094	12.42	11.519	11.835
-14	16.222	13.373	12.634	13.344
-13	19.274	16.224	15.296	16.193
-12	23.759	19.713	18.611	19.746
-11	27.821	23.009	21.555	22.652
-10	31.26	25.716	23.96	24.848
-9	33.673	27.445	25.66	26.629
-8	36.914	30.495	29.044	31.068
-7	44.085	37.236	35.632	37.972
-6	55.373	47.243	45.675	48.58
-5	69.461	57.844	54.721	56.84
-4	77.277	62.943	58.275	59.977
-3	80.886	66.183	61.584	63.775
-2	87.024	71.685	66.93	69.761
-1	97.305	80.315	75.173	78.861
0	112.9	93.339	87.621	91.345
1	126.81	104.87	98.579	102.81
2	151.41	126.35	119.41	125.08
3	172.69	143.82	135.39	141.38
4	195.44	160.79	149.83	155.15
5	211.35	172.3	159.95	165.01
6	222.75	181.46	168.46	173.38
7	233.59	190.94	177.47	183.21
8	249.04	204.49	190.69	197.82
9	275.75	228.08	212.81	219.82
10	304.75	249.99	233.23	241.58
11	330.02	270.35	251.14	259.91
12	351.21	286.3	265.29	273.15
13	367.8	299.33	277.31	286.71
14	383.67	312.54	289.05	297.29
15	396.62	322.72	298.45	307.31
16	409.04	332.72	307.63	316.17
17	424.03	344.77	318.83	327.67
18	439.455	356.58	329.93	339.65
19	454.88	368.9	340.81	349.24
20	462.45	374.36	344.96	353.88
21	470.09	380.9	351.6	362.83
22	484.75	394.88	365.4	376.36
23	502.65	413.09	382.92	394.7
24	521.25	425.1	390.24	404.03
25	537.92	435.83	397.61	412.67
26	550.07	448.4	414.18	425.02
27	569.69	460.54	426.68	437.7
28	582.69	473.3	437.97	449.47
29	599.95	487.94	450.66	463.37
30	616.66	501.42	463.11	478.84
31	641.61	522.86	484.65	497.9
32	664.4	539.68	498.74	512.19
33	682.3	554.67	511.85	525.23
34	696.7	564.91	520.36	532.57
35	704.27	570.64	526.13	538.36
36	715.69	580.91	536.71	550.55

## Sheet: Breeding Season
Time to sunrise (min)	416 nm	478 nm	542 nm	607 nm
-37	-0.0418315	0.0289669	0.0474481	0.008391
-36	-0.00590154	0.0252482	-0.00213437	0.0297885
-35	-0.00395763	0.0155043	0.0179502	0.0120822
-34	0.0751695	0.0668584	0.0769136	0.0745719
-33	-5.61e-05	0.00329554	0.0565885	0.0480428
-32	-0.00260275	0.0086258	0.0803487	0.0636101
-31	0.0288422	0.119629	0.131158	0.0912456
-30	0.112711	0.0971618	0.0540181	0.0699422
-29	0.218656	0.130126	0.11995	0.176744
-28	0.228601	0.124343	0.202597	0.169604
-27	0.227718	0.242145	0.183671	0.192414
-26	0.254423	0.337415	0.230522	0.189884
-25	0.409101	0.329088	0.298415	0.32683
-24	0.500654	0.442633	0.454969	0.398891
-23	0.668615	0.558959	0.579171	0.616179
-22	0.912804	0.675453	0.718403	0.753309
-21	1.16706	1.00095	0.93058	0.946564
-20	1.48145	1.25797	1.19941	1.25224
-19	2.04512	1.66794	1.61174	1.68298
-18	2.4628	2.08225	2.04131	2.09263
-17	3.23085	2.77174	2.64634	2.68746
-16	4.09933	3.441	3.31081	3.48629
-15	5.12648	4.3321	4.18637	4.35439
-14	6.48562	5.41515	5.10314	5.47828
-13	8.07306	6.74801	6.4159	6.7189
-12	10.0526	8.33754	8.01595	8.31133
-11	12.4024	10.2646	9.79744	10.3293
-10	15.0359	12.5985	11.8205	12.4159
-9	18.0034	14.9257	14.0337	14.7186
-8	21.3553	17.6711	16.5837	17.2854
-7	24.9056	20.5048	19.256	19.9908
-6	28.4999	23.4506	21.8965	22.5953
-5	32.3113	26.631	25.0401	26.2132
-4	37.2956	30.8049	28.7941	29.9866
-3	42.6929	35.1819	32.8616	34.1565
-2	48.5153	39.8619	37.4585	39.1912
-1	56.1244	46.2025	43.1979	44.8929
0	63.3567	52.144	48.6257	50.4477
1	70.8811	58.1689	54.2285	56.3249
2	79.6666	65.3602	61.4335	64.1559
3	91.0869	74.8462	69.7523	72.4548
4	101.31	82.8075	76.8787	79.59
5	110.915	90.6436	84.7392	87.7703
6	123.681	101.56	94.7468	98.2284
7	137.94	113.33	106.22	110.733
8	158.764	131.13	123.214	128.674
9	183.535	150.595	140.583	146.21
10	206.486	169.382	157.862	163.377
11	226.27	180.065	172.423	178.187
12	247.507	202.46	188.536	195.219
13	273.181	223.858	207.945	214.901
14	294.351	240.27	223.133	230.141
15	310.264	253.041	234.8	242.112
16	329.714	269.359	250.176	258.279
17	350.491	285.067	264.407	272.481
18	368.072	299.927	278.212	287.084
19	390.565	318.782	295.541	304.996
20	416.531	339.393	315.213	324.558
21	441.37	358.678	332.228	341.967
22	462.326	374.615	345.981	355.006
23	478.772	390.216	361.135	370.048
24	491.219	396.993	365.591	374.549
25	505.502	412.051	381.512	392.244
26	528	429.067	396.089	406.436
27	544.379	441.885	407.345	417.335
28	559.424	453.861	419.317	430.539
29	575.784	468.906	430.071	440.801
30	584.095	472.565	435.775	446.275
31	592.789	481.63	443.306	455.89
